# Supplementary material for: A strategy for the preparation of super-hydrophilic molybdenum disulfide composites applied to remove uranium from wastewater
Source: Royal Society of Chemistry journal article supplement (doi:10.1039/d3dt03553k), 2024-01-01
Supplement: d3dt03553k1.pdf [file d3dt03553k1.pdf]

**A strategy for the preparation of super-hydrophilic molybdenum disulfide  
composites applied to remove uranium from wastewater**

De-Bin Ji,<sup>a, b\*</sup> Shao-Xian Hao,<sup>a, b</sup> Xue-Qi Fan,<sup>a, b</sup> Rui-Long Liang,<sup>a, b</sup> Zhi-Qiang Qiao,<sup>a,</sup>

<sup>b</sup> Zi-Heng Bai,<sup>c</sup> De-Qiang Ji,<sup>a, b\*</sup> Qing-He Gao,<sup>d,\*</sup> Hong-Jun Wu<sup>a, b</sup>

<sup>a</sup> National Key Laboratory of Continental Shale Oil, Northeast Petroleum University,  
Daqing, Heilongjiang 163318, P. R. China

<sup>b</sup> College of Chemistry and Chemical Engineering, Northeast Petroleum University,  
Daqing 163318, P. R. China

<sup>c</sup> State Key Laboratory for Chemical Engineering, Tianjin University, Tianjin 300350,  
P. R. China

<sup>d</sup> Heilongjiang Provincial Key Laboratory of Oilfield Applied Chemistry and  
Technology, Daqing Normal University, Daqing 163712, P. R. China

\*Corresponding author.

Email: [jidebin900302@163.com](mailto:jidebin900302@163.com) (D. B. Ji)

Email: [jideqiang1990@126.com](mailto:jideqiang1990@126.com) (D. Q. Ji)

Email: [gao5510113@163.com](mailto:gao5510113@163.com) (Q. H. Gao)

NUMBER OF PAGES: 5

NUMBER OF FIGURES: 4

NUMBER OF TABLES: 3

---

\*Corresponding author.

Email: [jidebin900302@163.com](mailto:jidebin900302@163.com) (D. B. Ji)

Email: [jideqiang1990@126.com](mailto:jideqiang1990@126.com) (D. Q. Ji)

Email: [gao5510113@163.com](mailto:gao5510113@163.com) (Q. H. Gao)

## Contents

### Batch adsorption experiments

|                                                                                |                  |
|--------------------------------------------------------------------------------|------------------|
| XRD pattern of MoS <sub>2</sub> , NiCo-LDH and NiCo-LDH/MoS <sub>2</sub> ..... | <b>Fig. S1</b>   |
| Spectrum of total element distribution of NiCo-LDH/MoS <sub>2</sub> .....      | <b>Fig. S2</b>   |
| Uranyl ions exist in different pH forms.....                                   | <b>Fig. S3</b>   |
| Solution after desorption.....                                                 | <b>Fig. S4</b>   |
| Adsorption kinetic model parameters.....                                       | <b>Table. S1</b> |
| Parameters of the Intra-particle Diffusion Model.....                          | <b>Table. S2</b> |
| Parameters of adsorption isotherm model.....                                   | <b>Table. S3</b> |

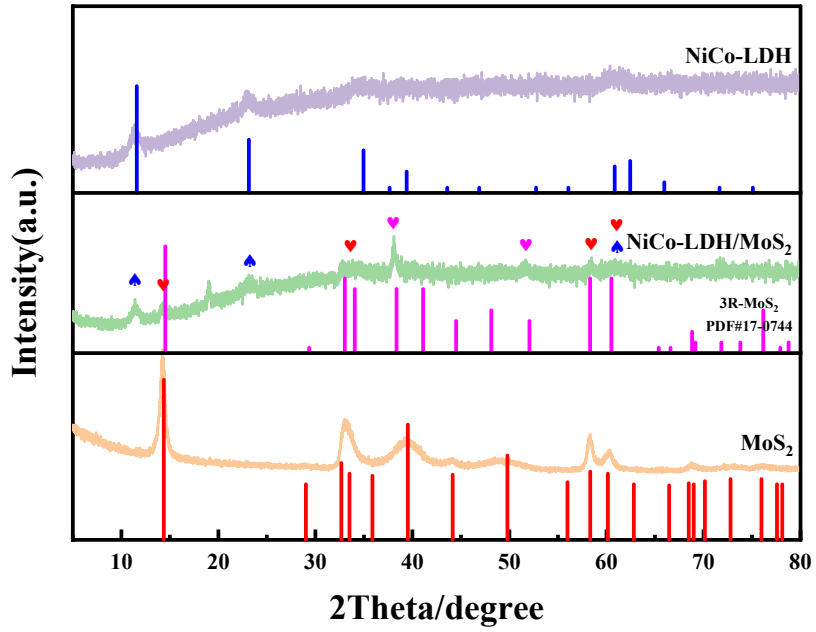

Fig.S1 The XRD pattern of MoS<sub>2</sub>, NiCo-LDH and NiCo-LDH/MoS<sub>2</sub>

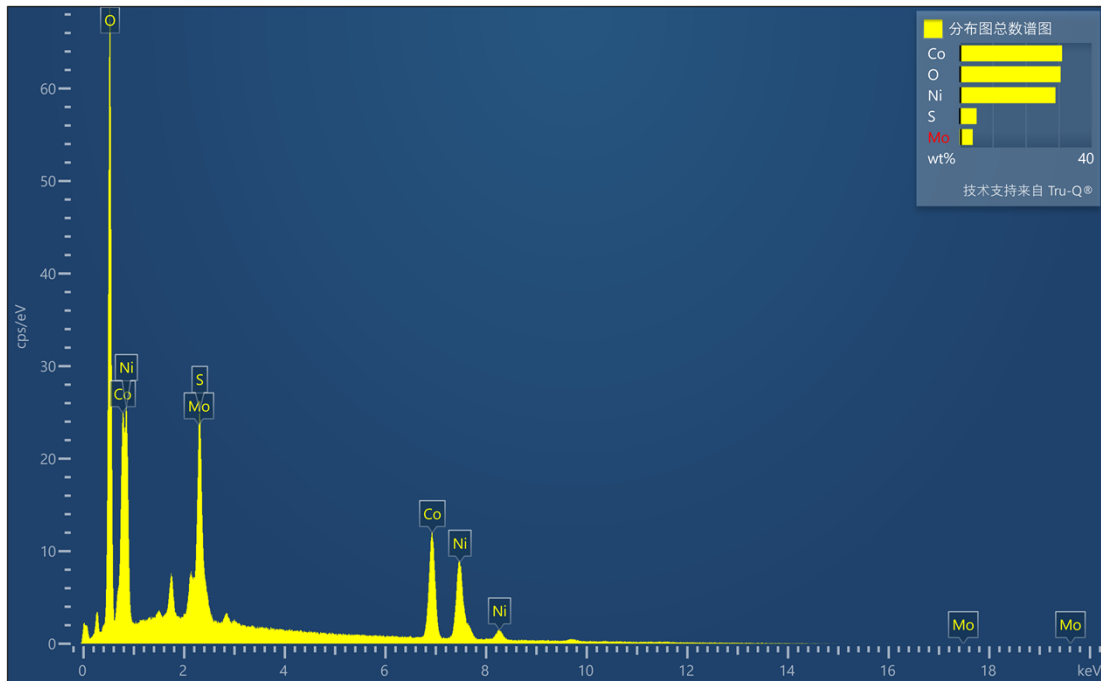

Fig.S2 Spectrum of total element distribution of NiCo-LDH/MoS<sub>2</sub>

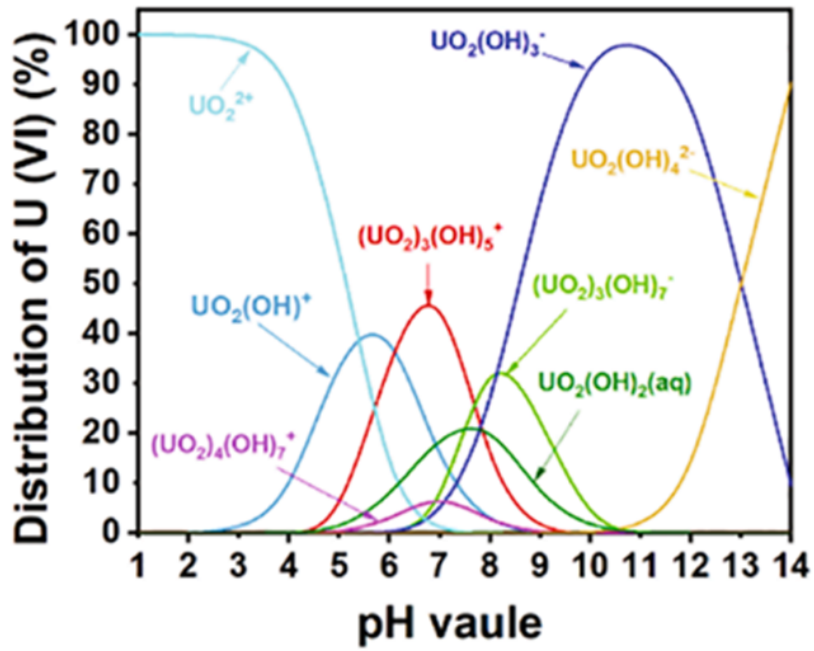

Fig.S3 Uranyl ions exist in different pH forms

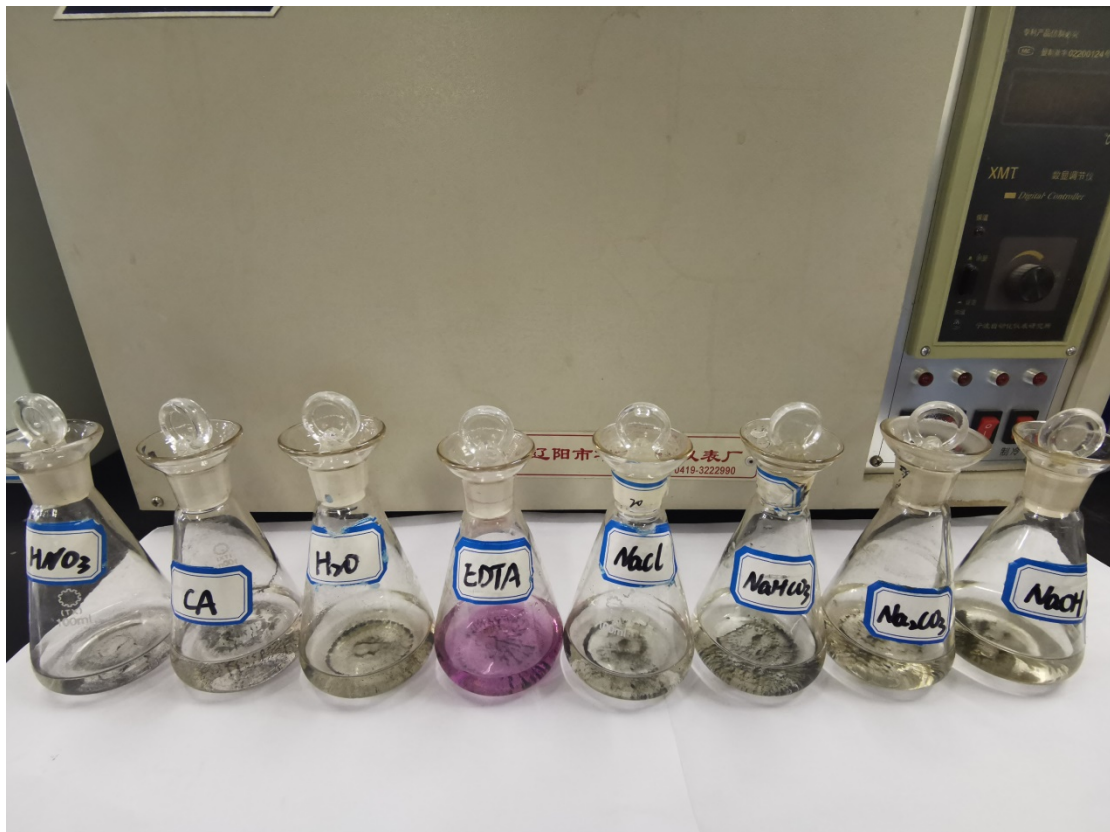

Fig.S4 Solution after desorption

Table S1 Adsorption kinetic model parameters

| Adsorbent                  | $Q_e$<br>(mg/g) | Pseudo-first-order models |                       |         | Pseudo-second-order models |            |         |
|----------------------------|-----------------|---------------------------|-----------------------|---------|----------------------------|------------|---------|
|                            |                 | $Q_e$                     | $k_1$                 | $R^2$   | $Q_e$                      | $k_2$      | $R^2$   |
|                            |                 | (mg/g)                    | ( $\text{min}^{-1}$ ) |         | (mg/g)                     | (g/mg·min) |         |
| MoS <sub>2</sub>           | 112.57          | 9.31                      | 0.00906               | 0.61819 | 112.74                     | 0.00466    | 0.99998 |
| MoS <sub>2</sub> /NiCo-LDH | 309.68          | 59.11                     | 0.01812               | 0.94004 | 312.50                     | 0.00095    | 0.99995 |
| NiCo-LDH                   | 238.89          | 116.32                    | 0.00555               | 0.66049 | 240.38                     | 0.00014    | 0.99280 |

Table S2 Parameters of the Intra-particle Diffusion Model

| Adsorbent                  | $k_{p1}$ | $R_1^2$ | $k_{p2}$ | $R_2^2$ | $k_{p3}$ | $R_3^2$ |
|----------------------------|----------|---------|----------|---------|----------|---------|
| MoS <sub>2</sub>           | 7.28     | 0.94492 | 1.26     | 0.66703 | 0.05     | 0.18833 |
| MoS <sub>2</sub> /NiCo-LDH | 20.35    | 0.99996 | 5.4      | 0.99253 | 0.2      | 0.6298  |
|                            |          |         | 3        |         | 8        |         |
| NiCo-LDH                   | 30.64    | 0.98538 | 5.4      | 0.98416 | 0.3      | 0.99448 |
|                            |          |         | 0        |         | 6        |         |

Table S3 Parameters of adsorption isotherm model

| Isothermal model | Parameter                               | 25°C     | 35°C     | 45°C     |
|------------------|-----------------------------------------|----------|----------|----------|
| Langmuir         | $Q_m$ ( $\text{mg}\cdot\text{g}^{-1}$ ) | 492.61   | 755.80   | 908.45   |
|                  | $b$ ( $\text{L}\cdot\text{mg}^{-1}$ )   | 0.11849  | 0.11316  | 0.11171  |
|                  | $R^2$                                   | 0.98487  | 0.98223  | 0.98122  |
| Freundlich       | $K_f$ ( $\text{L}\cdot\text{g}^{-1}$ )  | 139.9119 | 178.8521 | 200.7739 |
|                  | $n$                                     | 3.96557  | 3.33946  | 3.08938  |
|                  | $R^2$                                   | 0.83546  | 0.81592  | 0.85225  |
| Sips             | $Q_m$ ( $\text{mg}\cdot\text{g}^{-1}$ ) | 492.83   | 703.24   | 851.01   |
|                  | $K$                                     | 0.11837  | 0.13342  | 0.13032  |
|                  | $m$                                     | 0.99836  | 1.31326  | 1.23051  |
|                  | $R^2$                                   | 0.98609  | 0.99203  | 0.98341  |
